# Supplementary material
Source: publisher figshare collection journal article supplement (https://acs.figshare.com/ndownloader/files/4364689)
Supplement: Supplementary file 1 [file 4364689]

---

**Supporting Information for**

**Ionic Conductivity, Capacitance, and Viscoelastic Properties of  
Block Copolymer-Based Ion Gels**

Sipei Zhang,<sup>†</sup> Keun Hyung Lee,<sup>†</sup> C. Daniel Frisbie\*,<sup>†</sup> and Timothy P. Lodge\*,<sup>†,§</sup>

---

**Table S1. Vogel-Fulcher-Tammann (VFT) Fitting Parameters of Ionic Conductivity for the Ion Gels.**

$$\sigma = \sigma_0 \exp[-B/(T-T_0)]$$

| Polymer Content (wt%) | $\sigma_0$ (mS/cm) | $B$ (K)      | $T_0$ (K)   |
|-----------------------|--------------------|--------------|-------------|
| 10-SMS                | $246 \pm 15$       | $416 \pm 18$ | $189 \pm 3$ |
| 20-SMS                | $299 \pm 29$       | $717 \pm 43$ | $161 \pm 6$ |
| 30-SMS                | $298 \pm 21$       | $873 \pm 32$ | $164 \pm 4$ |
| 40-SMS                | $231 \pm 7$        | $847 \pm 12$ | $184 \pm 1$ |
| 50-SMS                | $272 \pm 6$        | $1045 \pm 9$ | $186 \pm 8$ |
| 10-SOS                | $325 \pm 31$       | $451 \pm 28$ | $186 \pm 4$ |
| 20-SOS                | $210 \pm 27$       | $494 \pm 47$ | $183 \pm 8$ |
| 30-SOS                | $164 \pm 14$       | $457 \pm 29$ | $201 \pm 5$ |
| 40-SOS                | $137 \pm 11$       | $458 \pm 26$ | $208 \pm 4$ |
| 50-SOS                | $71 \pm 4$         | $370 \pm 16$ | $223 \pm 3$ |

---

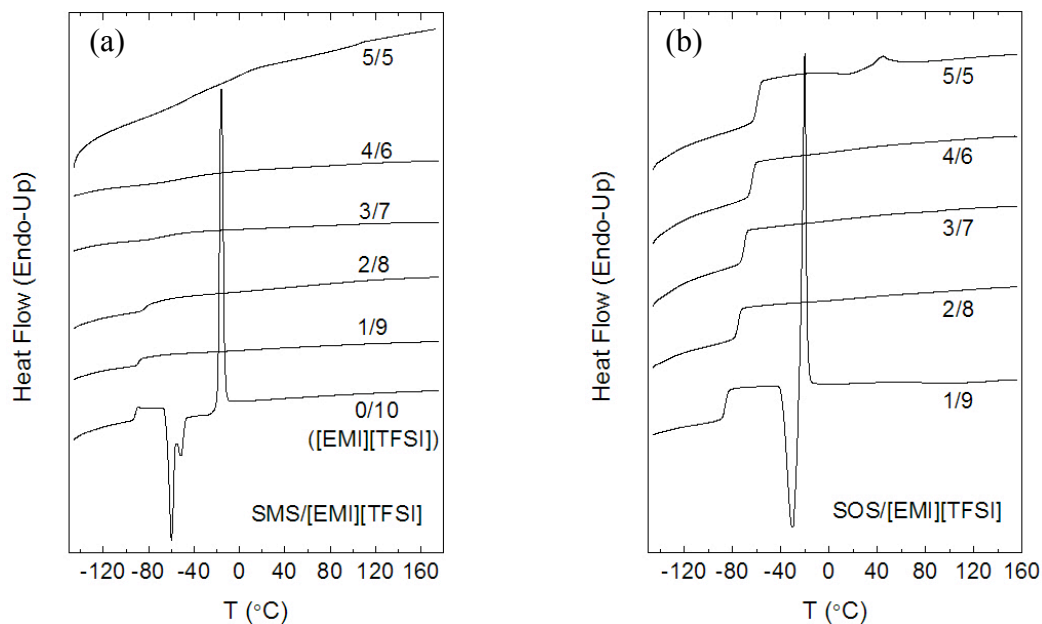

**Figure S1.** DSC thermograms of (a) [EMI][TFSI] and SMS/[EMI][TFSI] ion gels and (b) SOS/[EMI][TFSI] ion gels with different weight fractions of polymer. Thermal transitions were measured using TA Instruments Q1000 Differential Scanning Calorimeter (DSC). Samples in (a) and (b) weighing  $\sim 5 - 10$  mg were sealed in hermetic aluminum pans, heated up to  $180$   $^{\circ}\text{C}$  and  $160$   $^{\circ}\text{C}$ , respectively, cooled rapidly to  $-150$   $^{\circ}\text{C}$ , and then heated back up at  $10$   $^{\circ}\text{C}/\text{min}$ . The heating rate for the ion gel with  $50$  wt% SMS was  $20$   $^{\circ}\text{C}/\text{min}$ . The thermograms shown were taken from the second heating cycle, from which the glass transition temperatures were measured using the mid-point method.

**Table S2. Glass Transition Temperatures ( $T_g$ ) and Associated Transition Ranges for [EMI][TFSI] and the Ion Gels.**

| Polymer Content (wt%) | $T_g$ (°C) | Transition Range (°C) | $\Delta T_g$ |
|-----------------------|------------|-----------------------|--------------|
| 0                     | −91        | −96 ~ −89             | 7            |
| 10-SMS                | −88        | −95 ~ −58             | 37           |
| 20-SMS                | −84        | −92 ~ −40             | 52           |
| 30-SMS                | −69        | −89 ~ −20             | 69           |
| 40-SMS                | −54        | −83 ~ −6              | 77           |
| 50-SMS <sup>a</sup>   | −47, 3     | −81 ~ −23, −16 ~ 20   | 51, 36       |
| 10-SOS                | −86        | −91 ~ −81             | 10           |
| 20-SOS                | −75        | −88 ~ −66             | 22           |
| 30-SOS                | −70        | −83 ~ −63             | 20           |
| 40-SOS                | −64        | −78 ~ −52             | 26           |
| 50-SOS                | −60        | −79 ~ −49             | 30           |

<sup>a</sup> Heating rate is 20 °C/min.

**Table S3. Williams-Landel-Ferry (WLF) Fitting Parameters of Shift Factors ( $a_T$ ) for PMMA/[EMI][TFSI] Solutions.**

$$\log a_T = -C_1(T - T_{\text{ref}})/(C_2 + T - T_{\text{ref}})$$

| PMMA (wt%) | $C_1$           | $C_2$ (°C)  | $T_{\text{ref}}$ (°C) |
|------------|-----------------|-------------|-----------------------|
| 10         | $4.85 \pm 0.19$ | $126 \pm 3$ | 0                     |
| 20         | $3.68 \pm 0.08$ | $177 \pm 2$ | 70                    |
| 30         | $4.73 \pm 0.20$ | $262 \pm 6$ | 150                   |
| 40         | $6.28 \pm 0.33$ | $242 \pm 8$ | 140                   |

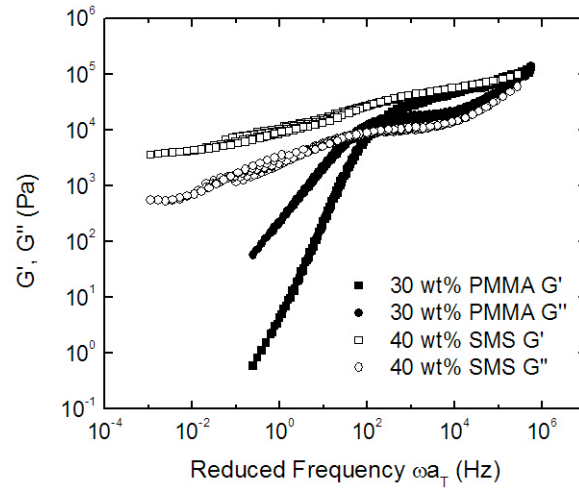

**Figure S2.** TTS master curves for dynamic storage and loss moduli of PMMA/[EMI][TFSI] solution with 30 wt% PMMA(126) and SMS/[EMI][TFSI] ion gel with 40 wt% SMS(18-86-18). PMMA concentration in the ion gel is 28 wt%. All curves are referenced to 120 °C.
